# Supplementary material for: Carbamazepine Induces Focused T Cell Responses in Resolved Stevens-Johnson Syndrome and Toxic Epidermal Necrolysis Cases But Does Not Perturb the Immunopeptidome for T Cell Recognition
Source: Front Immunol. 2021 Apr 12;12:653710. doi: 10.3389/fimmu.2021.653710 (PMC8071863; doi:10.3389/fimmu.2021.653710)
Supplement: Supplementary file 9 [file Table_1.xlsx]

## Sheet: HLA typing
Participant	ID	HLA class I
		A	B	C
Cases	T00016	02:01, 24:02	15:02:00
	T00024		15:02:00
	E10056	02:03, 11:01	15:02:00
	E10076	02:02, 29:01	15:02, 35:51
	E10314	02:03, 02:06	38:02, 48:03
	E10367	02:01, 11:01	15:02, 35:01
	E10630	02:06, 11:01	15:02:00
	E10493	02:01, 02:07	15:01, 46:01	01:02, 04:01
Healthy donors	AP005	01, 02	15:02, 35
	AP017	11, 24	15:02, 51
	AP022	02, 24	15:02, 40:06	08, 15
	AP026	01, 24	07, 15:02
	AP027	11, 33	15:02, 58
	AP029	24, 26	15:02, 40:01
	AP102	02:07, 11:01	15:02, 57:01	06, 08
