# Supplementary material for: Carbamazepine Induces Focused T Cell Responses in Resolved Stevens-Johnson Syndrome and Toxic Epidermal Necrolysis Cases But Does Not Perturb the Immunopeptidome for T Cell Recognition
Source: Front Immunol. 2021 Apr 12;12:653710. doi: 10.3389/fimmu.2021.653710 (PMC8071863; doi:10.3389/fimmu.2021.653710)
Supplement: Supplementary file 10 [file Table_2.xlsx]

## Sheet: TCR repertoire
Participant	ID	Drug Reaction	T cell subset	TRAV	TRAJ	CDR3a	TRBV	TRBJ	CDR3b	Pair frequency (n)	Uproductive chain	CIRCOS (CUD)
Healthy donors	AP022	Naïve	CD8+ IFNg-	1-2	8	CGERTQDLTHS#F	4-1	2-7	CASSQDIGAGSEQYF	2/24	alpha
				12-3	13	CAMILSGGYQKVTF	28	1-5	CASRIAPEAISNQPQHF	3/24	alpha (stop codon)
				13-1	11	CAPNP*IPDVAPS#F	20-1	1-1	CSARTGAMNTEAFF	3/24	alpha (stop codon)
				17	35	C*CPDRSRE*AA#C	5-6	2-7	CASSSSYEQYF	1/24	alpha (stop codon)
				5	4	CAESLSGGYNKLIF	6-4	2-1	CASSAPLAGKQI#SSYNEQFF	1/24	beta (stop codon)
				1-2	22	CAVRGISSGSARQLTF	2	1-1	CASSVTDPRGTEAFF	1/24
				12-2	41	CAVNRDSGYALNF	30	2-1	CAWSVLRNEQFF	1/24
				12-3	35	CAMTGGFGNVLHC	5-5	2-2	CASSFPPQTNTGELFF	2/24
				13-1	28	CAATPYSGAGSYQLTF	11-2	1-1	CASSLSANTEAFF	1/24
				17	35	CATVPIGFGNVLHC	5-6	2-7	CASSSSYEQYF	1/24
				17	43	CATDAGNDMRF	15	2-1	CATSRVDSNAYNEQFF	1/24
				21	33	CAVPMDSNYQLIW	27	2-3	CASSPLQGYTDTQYF	1/24
				22	58	CAVLVTSGSRLTF	13	2-7	CASSLQAGADEQYF	1/24
				22	58	CAVEETSGSRLTF	25-1	2-7	CASQTSGSDEQYF	2/24
				38-1	30	CARNRDDKIIF	11-2	2-7	CASSPGTSGISYEQYF	1/24
				38-2/DV8	48	CVNFGNEKLTF	20-1	2-1	CSARRTVDNEQFF	2/24
			CD8+ IFNg+	1-2	33	CAVSAMDSNYQLIW	16	2-7	CASSQAGEQYF	1/23
				1-2	43	CAVNPYNNNDMRF	4-1	1-3	CASSQGGKGGSSGNTIYF	3/23
				8-4	12	CAVSGGDSSYKLIF	30	1-2	CAWRGGFNYGYTF	3/23
				12-1	41	CVVNMVYSGYALNF	6-1	1-5	CASSGTDYSNQPQHF	1/23
				12-3	35	CAMTGGFGNVLHC	5-5	2-2	CASSFPPQTNTGELFF	9/23
				16	45	CALTRDRGGGADGLTF	3-1or3-2	2-1	CASSPDQILGEQFF	1/23
				21	33	CAVPMDSNYQLIW	27	2-3	CASSPLQGYTDTQYF	1/23
				22	5	CAVEETSGSRLTF	25-1	2-7	CASQTSGSDEQYF	1/23
				29/DV5	49	CAASEGTGNQFYF	12-3or12-4	2-7	CASSFLGDEQYF	1/23
				34	28	CGAPALYSGAGSYQLTF	6-5	2-1	CASSYGPNGGEQFF	1/23
				38-1	53	CAFLNSGGSNYKLTF	4-2or4-3	2-2	CASSLMGVVGELFF	1/23
	AP026	Naïve	CD8+ IFNg-	1-2	24	CAVRPPGWGKLQF	14	1-4	CASSFAGGEKLFF	1/14
				1-2	40	CAVSGTYKYIF	3-1or3-2	2-3	CASSQSGWDLSTDTQYF	1/14
				1-2	41	CAGNSGYALNF	24-1	2-3	CATSQGSDTQYF	3/14		orange
				14/DV4	17	CAMREGMMEAAGNKLTF	20-1	2-3	CSADSGTSGFLDTQYF	1/14
				14/DV4	32	CAMREVPGGATNKLIF	6-5	2-1	CASTD*GGGPHNEQF	1/14
				16	8	CALRDTGFQKLVF	9	2-7	CASSVGVADTYYEQYF	1/14
				23/DV6	36	CAANLQTGANNLFF	27	1-2	CASSSGFGYTF	1/14
				29/DV5	26	CAASPADLPNYGQNFVF	6-5	2-5	CASLVGETQYF	1/14
				29/DV5	44	CSTGTASKLTF	28	2-7	CATSGSSYEQYF	1/14
				38-2/DV8	43	CAYRSGNDMRF	6-9	1-1	FCANQGGRRTDPVL	1/14
				4	9	CLVGAPNTGGFKTIF	5-5	2-1	CASSFGVSYNEQFF	1/14
				8-2or8-4	45	LGGADGLTF	10-2	1-2	CASSESSTVDGYTF	1/14
			CD8+ IFNg+	26-1	26	CIVRSLRDNYGQNFVF	27	1-1	CASRAGGNTEAFF	16/16		reddish purple
Cases	T00016	SJS	CD8+ IFNg-	13-2	22	CAEP#ISSGSARQLTF	4-1	2-5	CASSHLAGAQETQYF	2/23	alpha (unresolved CDR3)
				17	47	CATGRIMEYGNKLVF	18	2-5	CASSPLAQL#ETQYF	1/23	beta (unresolved CDR3)
				1-2	33	CAVRDSKYQLIW	6-1	2-1	CASSEAGDGYNEQFF	1/23
				1-2	33	CAVLDSNYQLIW	6-5	2-7	CASSYSPGQGIYEQYF	1/23
				6	27	CALHNTNAGKSTF	4-1		CASSQDRASGSLSYEQYF	1/23
				6	44	CALGDTGTASKLTF	27	2-1	CASSPGLARNNEQFF	1/23
				8-2	21	CAVSEGNFNKFYF	13	2-5	CASSLDGLQETQYF	1/23
				8-2or8-4	26	CAKNYGQNFVF	25-1	2-7	CASSVGTGVYEQYF	1/23
				9-2	34	CALGISYNTDNLIF	9	2-4	CASSVDGRPKNIQYF	1/23
				12-3	34	CAMADYNTDKLIF	9	2-1	CASSDGTSLSYNEQFF	1/23
				14/DV4	31	CAMRPSRNNNARLMF	7-9	1-5	CASSFDTNQPQHF	1/23
				14/DV4	40	CAMRDTSGTYKYIF	28	2-2	CASSFLPGNTGELFF	1/23
				17	30	CATDAGDDKIIF	7-9	1-1	CASGKLFTEAFF	1/23
				17	30	CATAPNRDDKIIF	9	1-3	CASSVDGRSGNTIYF	1/23
				22	9	CAVADTGGFKTIF	29-1	2-7	CSVEERGQDYEQYF	1/23
				22	40	CAVPQASGTYKYIF	28	2-1	CASSDPRDRGNEQFF	1/23
				26-1	15	CIVRLINQAGTALIF	29-1	2-7	CSVAGTSSYEQYF	1/23
				26-1	31	CIVRVEAKMF	4-2or4-3	2-2	CASSQYTPMVTGSNGELFF	1/23
				26-1	39	CIVTHNAGNMLTF	13	1-1	CASSTSIGRGGKGNTEAFF	2/23
				29/DV5	34	CAASTDKLIF	12-3or12-4	2-1	CASSYSGRAEQFF	2/23
			CD8+ IFNg+	20	6	CAV#SGGSYIPTF	4-2or4-3	1-2	CASSSTTDLYGYTF	1/23	alpha (unresolved CDR3)
				20	30	CAVGRSS#	27	2-7	CASSSSYEQYF	1/23	alpha (unresolved CDR3)
				1-1	22	CAVLAPGSARQLTF	14	2-7	CASSQEGRGRYEQYF	4/23
				19	32	CALSEASGATNKLIF	9	2-7	CASSVAAGPNYEQYF	2/23
				4	13	CLVAMNSGGYQKVTF	6-6	2-1	CASSFGRGDYNEQFF	1/23
				4	21	CLVGPYNFNKFYF	24-1	1-1	CATSETDVLRPEAFF	1/23
				5	4	CAESPPDGYNKLIF	11-2	2-1	CASSQGLAGDNEQFF	1/23
				8-2or8-4	4	CVVSVFWGGYNKLTF	15	2-7	CATSRDRQGVFEQYF	4/23
				8-2	4	CVVSVFSGGYNKLIF	15	2-7	CATSRDRQGVFEQYF	1/23
				8-6	49	CAVRSNTGNQFYF	6-5	1-1	CASSSVRGRGNTEAFF	1/23
				12-2	48	CAVRDSFGNEKLTF	12-3or12-4	2-1	CASSPLLWEGLHEQFF	1/23
				12-2	49	CAVNTGNQFYF	5-4	2-1	CASSPMPYDEQFF	1/23
				14/DV4	49	CAITNTGNQFYF	2	1-1	CASSELQNTEAFF	1/23
				21	26	CAVDNYGQNFVF	28	2-1	CASSRQGLYSYNEQFF	1/23
				29/DV5	34	CAASTDKLIF	12-3or12-4	2-1	CASSYSGRAEQFF	1/23
				29/DV5	49	CAAVLPLSNTGNQFYF	6-5	1-5	CASRGGQGQPQHF	1/23
	T00024	SJS	CD8+ IFNg-	8-3	42	P#GGSQGNLIF	28	2-3	CASSEADGLDTQYF	1/19	alpha (stop codon)
				13-2	45	CAENMV##YSGGGADGLTF	29-1	2-7	CSVLRASEQYF	1/19	alpha (stop codon)
				19	23	CV#GGKLIF	9	1-5	CASSARYQPQHF	1/19	alpha (stop codon)
				36/DV7	39	CAVEAPNAGNMLTF	27	1-2		1/19	beta (unresolved CDR3)
				5	20	CAERDDYKLSF	7-9	2-1	CASTLGDNEQFF	1/19
				9-2	48	CALADLGNEKLTF	10-3	2-3	CAISPQGLTDTQYF	1/19
				13-1	31	CAAGDNARLMF	3-1	2-5	CASTPSGGHVEGYQETQYF	1/19
				13-2	11	CAETGYSTLTF	28	1-4	CASSLPLTGGGNEKLFF	1/19
				14/DV4	34	CAMRLPYNTDKLIF	29-1	2-7	CSVEGLAGNEQYF	1/19
				14/DV4	42	CAMREGGGSQGNLIF	13	1-2	CASSLWASNLGGYTF	1/19
				16	9	CAFNTGGFKTIF	13	1-1	CASSLGVANTEAFF	1/19
				19	40	CALSEATSGTYKYIF	29-1	2-7	CSVEDRDRDYEQYF	2/19
				26-1	48	CIVRRTLSNFGNEKLTF	6-5	2-6	CASSWRMRRSGANVLTF	1/19
				29/DV5	48	CAASALANFGNEKLTF	9	1-5	CASSARYQPQHF	1/19
				38-1	43	CAFEDWVDNNDMRF	5-5	2-1	CASSPGQTSDEQFF	2/19
				38-2/DV8	45	CAYNSGGGADGLTF	28	2-1	CASRATSWSYNEQFF	1/19
				41	34	CAARFYNTDKLIF	9	2-7	CASSPWTGSSYEQYF	1/19
			CD8+ IFNg+	8-2	16	CVVSE#DGQKLLF	28	2-7	CASSFGGEAYEQYF	1/23	alpha (stop codon)
				14/DV4	38	CVM*EGQVGNNRKLIW	30	1-2	CAWLGAGKVDGYTF	1/23	alpha (unresolved CDR3)
				30	45	IW*VYSGGGADGLTF	29-1	2-7	CSVLRASEQYF	1/23	alpha (unresolved CDR3)
				1-2	39	CAVEGAGNMLTF	6-1	2-7	CASSDLRYEQYF	2/23
				4	33	CLVGETGDSNYQLIW	3-1or3-2	2-1	CASSQGLAVIDNEQFF	6/23
				6	44	CALSLTGTASKLTF	5-6	2-7	CASSLVRSTYEQYF	1/23
				8-6	22	AAVTING*ARQLTF	24-1	2-1	CATSDLHYNEQFF	1/23
				8-6	40	CALSPGGTYKYIF	10-1	2-1	CASSDGLAAYNEQFF	1/23
				10	36	CVVSVQNGANNLFF	18	2-1	CASSPGLSYNEQFF	1/23
				16	9	CAFNTGGFKTIF	13	1-1	CASSLGVANTEAFF	2/23
				19	29	CALSENSGNTPLVF	28	1-2	CASGDSPFPLQGYTF	1/23
				19	23	CALRGVAQGGKLIF	24-1	2-1	CATSDPRTSGRTYNEQFF	1/23
				19	31	CAVSDRNNNARLMF	5-4	2-7	CASSLPGQGAVEQYF	1/23
				29/DV5	42	CAASGNYGGSQGNLIF	5-4	2-7	CASSLVERARNEQYF	1/23
				30	53	CGTVDSGGSNYKLTF	29-1	2-7	CSVLRASEQYF	1/23
				34	52	CGADNSMNAGGTSYGKLTF	6-2or6-3	1-1	CASSYFDNTEAFF	1/23
	E10056	SJS	CD8+ IFNg-	14/DV4	17	CAMRVRELQATS*L	28	1-6	CASSYQGVLSYNSPLHF	1/18	alpha (stop codon)
				14/DV4	45	LGAHSGGGADGLTF	23-1	1-4	CASVGTAATNEKLFF	1/18	alpha (stop codon)
				29/DV5	31	WAASGNNNARLMF	13	2-7	CASSPEGLRSYEQYF	1/18	alpha (stop codon)
				1-2	15	CAVKQAGNHLIW	20-1	2-7	CSARAMRLAGGFEYEQYF	1/18
				6	9	CALRNTGGFKTIF	4-2or4-3	1-1	CASSQEGRRIRTGGTEAFF	1/18
				6	15	CALQPGRNCSDL	2	2-5	CASGGTGAQETQYF	1/18
				9-2	23	CALDNQGGGAYL	11-2	2-5	CASSLTLGLAGYQETQYF	1/18
				9-2	23	CALDNQGGKLIF	20-1	2-1	CSARTGLAGGPYYNEQFF	1/18
				12-2	39	CAFRRAGNMLTF	28	1-6	CASSYQGVRSYNSPLHF	1/18
				12-2	47	CAVTPYGNKLVF	5-4	2-1	CASSRAVVEGYNEQFF	1/18
				19	27	CALRARAPMHKKSTF	9	1-2	CASSPREDRGEQGYTF	2/18		yellow
				19	30	CALSDHRDDKIIF	24	2-3	CATSGVGGADTQYF	2/18		vermillion
				19	48	CALSPFGNEKLTF	4-1	2-1	CASSQVLRGGTNEQFF	1/18
				27	26	CAGADNYGQNFVF	12-3or12-4	1-4	CASALNEEKLFF	2/18		green
				38-2/DV8	43	CAYFGGGNNDMRF	7-9	2-2	CASSEGQANTGELFF	1/18
			CD8+ IFNg+	21	12	CAANDGMDSSYKLIF	14	2-1	CASSQDWA*PNTMSSS	3/12	beta (stop codon)	sky blue
				21	43	*AAKDGGDSRNNMIF	14	2-1	CASSQDWA*PNTIALF	1/12	beta (stop codon)
				21	12	CAAKDGMDSSYKLIF	30	1-2	CAWLGAGKVDGYTF	8/12		blue
	E10076	SJS	CD8+ IFNg-	16	58	VFLNPLNQWIQV##F	5-5	2-3	CASSSGWGSSADTQYF	1/10	alpha (unresolved CDR3)
				1-1	20	CAVPNDYKLSF	27	2-7	CASTKQAGGSYEQYF	1/10
				1-2	33	CASNSNYQLIW	7-9	2-7	CASSLADRTYEQYF	1/10
				1-2	28	CAVTRAGSYQLTF	18	2-2	CASSPPGTGELFF	1/10
				6	31	CAQYPQ#ARLMF	19	1-3	CASRASGDTGNTIYF	1/10
				14/DV4	30	CAMRESHDDKIIF	28	1-2	CASSLPSNYGYTF	1/10
				17	8	CATDGGFQKLVF	6-5	2-2	CATGTPRGELFF	1/10
				20	54	CAVQAPRAQKLVF	4-1	2-1	CASSQVPYNEQFF	1/10
				20	49	CAVRDTGNQFYF	7-9	2-7	CASSSPSSYEQYF	1/10
				22	18	CAVGGRLYF	28	1-4	CASSSNRDPGRKLFF	1/10
			CD8+ IFNg+	8-4	45	CAVNKPGGGADGLTF	14	2-2	LGSSVGEPLAV#F	1/10	beta (unresolved CDR3)
				8-6	53	CAVSDGGSNYKLTF	15	2-7	CATSSQPFSEQYF	1/10
				12-2	12	CAVSKDSSYKLIF	27	2-4	CASSLGGEIQYF	1/10
				12-3	42	CAMIYRGGSQGNLIF	9	2-1	CASTSGFDLNEQFF	1/10
				13-2	27	CAADR#AGKSTF	9	2-1	CASTSGFDLNEQFF	2/10
				14/DV4	30	CAMRESHDDKIIF	28	1-2	CASSLPSNYGYTF	1/10
				23/DV6	49	CAASLPRGTGNQFYF	12-3or12-4	1-1	CASSSLTVGDTEAFF	1/10
				26-1	39	CIVRVG#NAGNMLTF	27	1-2	CASSSGTTHGYTF	1/10
				35	34	CAGLNYNTDKLIF	28	1-1	CASSFPNTEAFF	1/10
	E10314	SJS	CD8+ IFNg-	34	46	CGADIESSGDKLTF	7-3	1-1	CASSLI*RGH*SF#F	1/22	beta (unresolved CDR3)
				1-1	12	CAVSMDSSYKLIF	2	1-2	CASSGGGTNYGYTF	1/22
				3	29	CAVRPYSGNTPLVF	29-1	2-3	CSATRDTQYF	1/22
				4	13	CLVGDTGYQKVTF	29-1	2-3	CSVEEGSGTSTDTQYF	1/22
				8-2or8-4	21	CAVSNFNKFYF	14	2-1	CASSQIGTPSSYNEQFF	1/22
				8-6	34	CAVSGNTDKLIF	27	2-2	CASRGGVTNTGELFF	2/22
				14/DV4	11	CAMSRYSTLTF	9	2-1	CASSVAGGQDEQFF	1/22
				14/DV4	24	CAMREGEGRTDSWGKLQF	3-1or3-2	2-7	CASSQGLAGPYEQYF	1/22
				19	15	CALIQAGTALIF	18	2-6	CASSSGTGPSGANVLTF	1/22
				19	34	CALREPYNTDKLIF	28	1-5	CASTAQGYANQPQHF	1/22
				20	49	CAVQEGTGNQFYF	16	2-3	CASSQAGYADTQYF	1/22
				27	24	CAGTNSDSWGKLQF	6-5	2-1	CASQGAVGDEQFF	5/22
				29/DV5	20	CAAVSSGNKFSF	29-1	2-6	CSVDFVGANVLTF	1/22
				29/DV5	34	CAASAQGTDKLIF	12-3or12-4	2-2	CASSLSEAPTGELFF	1/22
				38-2/DV8	53	CAYIDSGGSNYKLTF	27	2-1	CASRTSGGLGSYNEQFF	3/22
			CD8+ IFNg+	21	54	GFQIREPRYW#F	28	2-2	CASSSYRDTNTGELFF	1/24	alpha (unresolved CDR3)
				1-2	30	CAVSNYDKIIF	20-1	2-7		1/24	beta (unresolved CDR3)
				5	37	CAESIDTGKLIF	14	1-1	CASSPGPLGGGF#EAFF	9/24	beta (unresolved CDR3)
				20	11	CAVSGYSTLTF	10-3	2-7		1/24	beta (unresolved CDR3)
				8-6	48	CAVSDPFGNEKLTF	20-1	2-2	CSARDKRQADTGELFF	2/24
				12-2	12	CAVKEDSSYKLIF	20-1	2-2	CSARRQGNTGELFF	2/24
				12-2	16	CAVNNGQKLLF	27	1-4	CASSPETGATNEKLFF	1/24
				12-2	17	CAVNIVAGEAAGNKLTF	9	1-1	CASSVVVAAGTEAFF	1/24
				14/DV4	30	CAMRESFRDDKIIF	9	2-1	CASSPAERLHNEQFF	1/24
				16	29	CVVVHRSGNTPLVF	24-1	2-7	CATSDRSGTGTYEQYF	1/24
				19	11	CALTNSGYSTLTF	9	2-3	CASSVGAGVEDTQYF	1/24
				22	36	CAGLLKTGANNLFF	12-3or12-4	1-1	CASSVSPGGTEAFF	2/24
				29/DV5	20	CAAVSSDYKLSF	29-1	2-6	CSVDFVGANVLTF	1/24
	E10630	SJS	CD8+ IFNg-	5	14or34		27	2-1	CASSLGNYNEQFF	1/21	alpha
				9-2	45	CALSL*EGGADGLTF	4-2or4-3	1-6	CASSQGRTGGLGNSPLHF	2/21	alpha (stop codon)	black
				13-1	49	CAVSVFEKDSI	3-1or3-2	2-5	WPAANPVGLAKPRDPVL	1/21	alpha (stop codon)
				13-2	6	CAENIEEEATYLH	12-3or12-4	2-1	CASSWEQEGNNEQFF	1/21	alpha
				14/DV4	56	CAMREFLYTGANSKLTF	10-2	2-7	CASSGLAGRCHTSST	1/21	beta
				8-3	48	CAVGAPDGNEKLTF	20-1	2-3	CSPTSGTQYF	1/21
				8-6	26	CAANNYGQNFVF	3-1or3-2	2-7	CASSQDSYSYEQYF	1/21
				9-2	50	CALLGTGSTSYDKVIF	2	2-7	CASSDGTRVYEQYF	1/21
				12-1	44	CVVGGGTASKLTF	2	2-1	CASSGRGNYNEQFF	1/21
				12-1	20	CVVNLNDYKLSF	2	2-1	CASRIPGSAYNEQFF	1/21
				12-2	28	CAVFLGAWSYQLTF	28	1-5	CASSLEGVNQPQHF	1/21
				19	58	CALSEWEETSGSRLTF	9	2-7	CASSVGLAGVYEQYF	1/21
				21	31	CAVNNARLMF	11-2	1-1	CASSLVGLGDAFF	1/21
				26-1	9	CIVRVANTGGFKTIF	27	2-2	CASSVGPLAGELFF	1/21
				26-1	24	CIVNTDSWGKFQF	20-1	1-1	CSAQNTEAFF	1/21
				29/DV5	29	CAASSWAGNPPLVF	5-4	1-2	CASSPVGGASYGYTF	1/21
				30	20	CGTEINDYKLSF	3-1or3-2	2-1	CASSHLPQGAEFF	2/21		sky blue
				35	42	CAGLRGSQGNLIF	3-1or3-2	2-7	CASSQGGVESEQYF	1/21
				38-2/DV8	43	CALDNNDMRF	15	2-2	CATSKGRLNTGELFF	1/21
			CD8+ IFNg+	1-2	32	SAAGGANKLIF	27	2-3	CASSSLSGGWPDTQYF	1/24	alpha (stop codon)
				1-2	32	SAAGGAYKLSF	27	2-3	CASSSLSGGWPDTQYF	1/24	alpha (stop codon)
				1-1	32	CAPPSPRGATNKLIF	27	2-3	CASSSLSGGWPDTQYF	2/24		yellow
				1-2	20	CAAFGDYKLSF	27	2-3	CASSSLSGGWPDTQYF	18/24		orange
				1-2	41	CAVRDQNSNSGYALNF	20-1	2-7	CSARSPRSSYEQYF	1/24
				1-2	41	CAVRLQDSNSGYALNF	20-1	2-7	CSARSPRSSYEQYF	1/24
	CUD; Colour Universal Design
	* = stop codon
	# = out-of-frame junction
		unproductive
